1           Functional activity of antisera against recombinant Zika virus envelope  
2                           protein subunits expressed in *Escherichia coli*

3

4

5   Hong-Yun Tham<sup>1</sup>, Man Kwan Ooi<sup>1</sup>, Vinod RMT Balasubramaniam<sup>1</sup>, Sharifah Syed Hassan<sup>1</sup>,

6   Hong-Wai Tham<sup>2\*</sup>

7

8

9   <sup>1</sup> Virus–Host Interaction Research Group, Jeffrey Cheah School of Medicine and Health

10   Sciences, Monash University Malaysia, Subang Jaya, Selangor, Malaysia

11

12   <sup>2</sup> Biopharmaceutical Research Unit, Biology Research Laboratory, Faculty of Pharmacy, SEGi

13   University, Petaling Jaya, Selangor, Malaysia

14

15

16   \* Corresponding author

17   Email: [thamhongwai@outlook.my](mailto:thamhongwai@outlook.my) (H-WT)

## 18 **Abstract**

19 The global Zika virus (ZIKV) outbreak across continents has been drawing research attentions  
20 to researchers and healthcare professionals. It highlights the urgent development of ZIKV  
21 vaccines that offer rapid, precise and specific protection to those living in the high-risk regions -  
22 the tropical and subtropical regions. As a public health priority, there is a progressive  
23 development in the discovery of vaccine candidates and design in recent years. Many efforts  
24 have been placed in the *in vitro* development of ZIKV subunits as the vaccine candidate in  
25 various protein expression systems, including bacteria, yeast, plant cells, insect cells and  
26 mammalian cells. However, due to the lack of knowledge on humoral and cellular immune  
27 responses against virus vaccines, a commercialised vaccine against Dengue virus (DENV) has  
28 been suspended due to a health scare in Philippines. Moreover, the closely-related DENV and  
29 ZIKV has indicated serological cross-reactivity between both viruses. This has led to greater  
30 attentions to precautions needed during the design of ZIKV and DENV vaccines. In this study,  
31 we pre-selected, synthesised and expressed the domain III of ZIKV envelope protein (namely  
32 rEDIII) based on a previously-established report (GenBank: AMC13911.1). The characteristics  
33 of purified ZIKV rEDIII was tested using SDS-PAGE, Western blotting and LC-MS/MS. Since the  
34 ZIKV rEDIII has been well reported as a potential protein candidate in ZIKV vaccine  
35 development, we assessed the possible outcome of preexisting immunity against the rEDIII  
36 proteins by conducting dot-blotting assays using mice antisera pre-immunised with ZIKV  
37 particles (ZIKV strain: MRS\_OPY\_Martinique\_PaRi\_2015, GenBank: KU647676). Surprisingly,  
38 the antisera was able to recognise the rEDIII of a different ZIKV strain (GenBank: AMC13911.1).  
39 Despite its great antigenicity in eliciting humoral and cellular immunity against ZIKV infection,  
40 our finding calls for greater attention to evaluate the details of ZIKV rEDIII as a stand-alone  
41 vaccine candidate.

## 42 Introduction

43 Zika virus (ZIKV), a member of the *Flaviviridae* family, is transmitted between humans by its  
44 main mosquito vectors, *Aedes aegypti* or *Aedes albopictus* [1,2]. ZIKV carries a single-stranded,  
45 positive-strand RNA genome of about 11 kb in length [3]. Despite its first isolation from *Rhesus*  
46 *macaque* in 1947, limited reports on human infection is available. This is largely due to its self-  
47 limited illnesses including low-grade fever, headache, myalgia and arthralgia [4–6]. There are  
48 two lineages (African and Asian) and three genotypes (East African, West African, and Asian) of  
49 ZIKV circulated in tropical and subtropical regions [7]. As of 2018, the diagnosis assays for ZIKV  
50 comprised of 5 serological assays and 14 molecular assays with Food and Drug Administration  
51 Emergency Use Authorisation (FDA EUA), which have been well reviewed by in 2018 by Theel  
52 and Hata [8]. On the other hand, in terms of vaccine candidate discovery and development, a  
53 recent article by Alan Barrett reported that over 45 vaccine candidates have been discovered,  
54 with at least 9 are currently in clinical evaluation [9]. Nevertheless, it is not plausible to develop  
55 an efficacious ZIKV vaccine in near future due to the serological cross reactivity of antibodies  
56 between Dengue virus (DENV) and ZIKV [10–14]. In addition, similarities in transmission  
57 process, disease manifestations and transmitting vectors between Zika fever and Dengue fever  
58 are often confused [15,16], which have further halted the development of ZIKV-specific vaccine  
59 candidate.

60

61 Since its declaration as Public Health Emergency of International Concern by World Health  
62 Organisation (WHO) in February 2016, Zika virus has been associated with microcephaly and  
63 neurological complications such as Guillain-Barré syndrome [17,18]. Since then, international  
64 attention has been brought towards the rapid chain of disease outbreak, which was spread  
65 throughout South, Central and part of North America, followed by Asia Pacific [19,20]. Vector  
66 transmission of Zika fever occurs mainly in tropical regions. However, cases in returning

67 travellers have frequently been reported in locations including Europe, US, Australia, New  
68 Zealand, Japan, UK, and China [21–25].

69

70 Upon infection, ZIKV was reported to persist in body fluids, such as urine or saliva, for longer  
71 than that of in the blood [26–28]. This becomes an important consideration in the development  
72 of rapid and effective tools for ZIKV detection. Prior to 2018, several research groups reported  
73 various ZIKV detection strategies, including a newly developed strategy - liposome-based  
74 immunoassay reported by Shukla *et. al.* [29], who reported the low sensitivity of 5 commercially  
75 available immunoassays to detect ZIKV infection [30]. Soon after, Powley *et. al.* reviewed the  
76 current methods of ZIKV detection and their limitations [31]. The authors highlighted a few  
77 restrictions including the need of expensive machineries, trained personnels, intensive laborious  
78 processes, viral RNA stability, lack of specific anti-ZIKV antibodies, and possibilities of false-  
79 positive results with current diagnostic techniques. In addition, Pawley *et. al.* also emphasised  
80 the importance of anti-ZIKV monoclonal antibodies in the development of novel point-of-care  
81 paper-based detection method [31]. This has again emphasised the importance of the domain  
82 III of ZIKV envelope protein, which carries a strong antigenicity and greatest power of  
83 discrimination from other members of Flavivirus [13,32], as an ideal protein candidate in  
84 ongoing and future development of point-of-care testing for active infection for ZIKV.

85

86 Recombinant domain III of ZIKV envelope protein (rEDIII) has been previously expressed and  
87 purified using different protein expression systems, including yeast [33], insect cells [34,35],  
88 plant cells [36,37] and bacterial cells [34,35,38]. Sylvia *et. al.* proved the integrity of rEDIII  
89 through SDS-PAGE, Western blot and immunoblotting [39], while Yang *et. al.* described the  
90 generation and immunogenicity of the ZIKV rEDIII as a protein subunit vaccine candidate, which  
91 was also demonstrated to elicit anti-rEDIII monoclonal antibody in pre-clinical studies [35]. In  
92 accordance with this, this study was designed not only to construct a protein-expression plasmid

93 for recombinant ZIKV envelope protein (domain III, rEDIII) production, but also to assess the  
94 possibilities of the ZIKV rEDIII to cause antibody dependent enhancement (ADE) or serum  
95 sickness (SS) in the recipients, especially those who had exposed to ZIKV infection prior to  
96 receiving vaccine which contains rEDIII as the vaccine candidate.

## 97 **Materials and methods**

### 98 **Zika virus EDIII gene**

99 Complete coding sequence of the domain III of Zika virus (strain: PRVABC59) envelope protein  
100 (EDIII) was retrieved from National Centre for Biotechnology Information (NCBI) (GenBank  
101 accession number: AMC13911.1) [35,36]. Gene block and primers were synthesised (Integrated  
102 DNA Technologies, IDT<sup>®</sup>) and stored in -20 °C until used.

### 103 **Gene cloning and protein expression**

104 ZIKV EDIII gene was synthesised and cloned in pUCIDT plasmid vector, namely pUCIDT-  
105 ZVEDIII. The plasmid was transformed into *Escherichia coli* DH5 $\alpha$  strain for long-term storage at  
106 -80 °C. After plasmid purification, ZIKV EDIII coding sequence was amplified using primers  
107 (forward: TCTGCAGCTGGTACCGCGTTCACATTCACCAAGATCCCGGCTG; reverse:  
108 TCAAGCTTCGAATTCTGCTTTTCCAATGGTGCTGCCACTCCTG) with the following PCR  
109 conditions: 1 cycle of 94 °C (2 minutes); 35 cycles of 94 °C (45 seconds), 55 °C (45 seconds),  
110 72 °C (1 minute); 1 cycle of 72 °C (10 minutes); on hold at 4 °C until use. PCR product was  
111 cloned in-frame into pRSET-B protein expression vector (Invitrogen, CA, USA) using In-  
112 Fusion<sup>®</sup> HD Cloning Plus (Takara Bio, USA). Recombinant plasmid was transformed into  
113 competent *E. coli* BL21 (DE3) strain for protein expression analysis.

114

115 For protein expression, an overnight culture of transformed BL21 (DE3) *E. coli* was diluted to  
116 1:100 with Luria Bertani broth supplemented with ampicillin at final concentration of 75  $\mu$ g/mL.  
117 Bacteria culture was incubated (37 °C, 180 rpm) until OD<sub>600</sub> of 0.50 was reached. Protein  
118 expression was induced by the addition of IPTG to the final concentration of 1 mM and

119 incubation was further conducted for 3 hours (37 °C, 180 rpm). Then, the cells were harvested  
120 by centrifugation (3000 g, 4 °C, 2 minutes). Cell pellet was resuspended in SDS reducing buffer,  
121 aliquoted into 50 µL, heated at 99 °C for 10 minutes before loading into a 12% SDS acrylamide  
122 gel.

## 123 **SDS-PAGE and Western blot**

124 SDS-PAGE was conducted in vertical direction at 100 V in a 1x Tris-glycine running buffer (25  
125 mM Tris, 192 mM Glycine, 0.1% SDS, pH 8.3) [40]. After that, protein bands were stained with  
126 R-250 Coomassie Brilliant Blue stain. Another duplicated gel was subjected to Western blotting.  
127 Protein bands were transferred onto PVDF membrane [41], followed by blocking (5% BSA, 1  
128 hour, 25 °C), primary antibody (anti-Xpress monoclonal antibody, 1:5000 dilution, 1 hour, 25 °C),  
129 and secondary antibody (anti-mouse IgG, 1:5000 dilution, 1 hour, 25 °C). Protein bands were  
130 visualised by addition of substrate (BCIP/NBT).

## 131 **rEDIII purification**

132 ZIKV rEDIII was purified with gradual decrease of urea concentration (8 M, 6 M, 4 M, 2 M and 0  
133 M) to progressively remove urea through dialysis. All buffers (except elution buffer) were  
134 supplemented with 20 mM imidazole to reduce nonspecific binding of unwanted protein to the  
135 HisTrap HP histidine-tagged protein purification columns (GE Healthcare). In brief, after protein  
136 expression, cell pellets of transformed BL21 (DE3) *E. coli* was suspended in dissolving buffer  
137 supplemented with 8 M urea. Mixture was incubated in HisTrap HP histidine-tagged protein  
138 purification columns at room temperature for 30 minutes, followed by washing steps using a  
139 series of buffers supplemented with 6 M, 4 M, 2 M and 0 M of urea. Lastly, rEDIII was eluted  
140 with elution buffer (supplemented with 0 M urea and 500 mM of imidazole). Eluents were

141 subjected to dialysis using 1x PBS buffer at 4 °C for 2 hours. Purified rEDIII was kept at 4 °C for  
142 further analyses.

## 143 **LC-MS/MS**

144 The rEDIII protein band was excised from polyacrylamide gel and the sample was prepared for  
145 *de novo* protein sequencing using in-gel digestion according to manufacturer's protocol (Agilent  
146 Technologies, Inc., 2015). Briefly, the excised gel slice was destained with 200 mM of  
147 ammonium bicarbonate (ABC) in 40% acetonitrile (ACN), followed by reduction and alkylation  
148 by DTT and IAA respectively. After that, gel slice dehydrated by 100% CAN (15 min, 37°C). The  
149 dehydrated gel slice was incubated with trypsin (16 hours, 37 °C) and the reaction was stopped  
150 by addition of formic acid. The tryptic peptides were further extracted from the gel slices using  
151 50% ACN and 100% ACN for 15 min each. The recovered peptides were analysed using Agilent  
152 1200 HPLC-Chip/MS interface, coupled with Agilent 6550 iFunnel Q-TOF LC/MS. The *de novo*  
153 sequences was analysed and aligned using PEAKS 8.0 software [42].

## 154 **rEDIII protein integrity test**

155 Gold Syrian hamsters were bred and housed at the specific pathogen free (SPF) animal  
156 facilities, Monash University Malaysia. Ethics approval for animal housing and experimentation  
157 were obtained (Monash Animal Ethics: MARP/2017/060). Hamsters were administered  
158 subcutaneously with Zika virus (strain: MRS\_OPY\_Martinique\_PaRi\_2015, NCBI: KU647676)  
159 with TiterMax adjuvant at  $10^7$  pfu. After 35 days, serum sample were collected to determine its  
160 binding ability towards ZIKV rEDIII proteins.

161

162 The integrity of ZIKV rEDIII was determined through Dot Blot assay. First, purified rEDIII was  
163 immobilised on a PVDF membrane at 1 µg per dot. rEDIII were dried at 25 °C before blocking



164 (5% BSA, 1 hour, 25 °C). After washing, mouse serum (1:500) were applied (1 hour, 25 °C),  
165 followed by anti-mouse IgG (1:5000, 1 hour, 25 °C) before visualisation using BCIP/NBT as the  
166 substrate. Control spots were also conducted concurrently using mock-infected mouse serum.

## 167 **Results**

### 168 **rEDIII expression**

169 The coding sequence of ZIKV rEDIII (GenBank accession number: AMC13911.1) was  
170 synthesised and cloned in-frame into pRSET-B protein expression vector for protein expression  
171 using *E. coli* BL21 (DE3). After SDS-PAGE, based on the molecular weight, the rEDIII was  
172 expressed at its expected size (total of 14 kDa) with the 11 kDa moiety carrying a 6x histidine  
173 tag at the N-terminal of the recombinant protein. Hence the total expected protein size of 14 kDa  
174 (Fig 1).

175

176 **Fig 1. Expression of recombinant domain III of Zika virus (ZIKV) envelope protein (rEDIII)**  
177 **in *Escherichai coli* BL21 (DE3).** (M) Protein marker; (1) Negative control: The cellular lysate of  
178 untransformed BL21 (DE3) *E. coli* ; (2) Supernatant of transformed and IPTG-induced BL21  
179 (DE3) *E. coli* after sonication; (3) Pelleted inclusion body and cellular debri of transformed and  
180 IPTG-induced BL21 (DE3) *E. coli* after sonication. The presence of ZIKV rEDIII is indicated by  
181 black arrow.

### 182 **Western blotting**

183 Western blot was conducted on PVDF membrane using anti-Xpress antibody as the primary  
184 antibody. Ther result showed that ZIKV rEDIII was expressed at the expected size (14 kDa) (Fig  
185 2).

186

187 **Fig 2. Western blotting analysis shows the presence of the recombinant domain III of**  
188 **Zika virus (ZIKV) envelope protein (rEDIII) at the expected position (14 kDa, indicated by**

189 **black arrow**). (M) Protein marker; (1) Negative control which contains the cellular lysate of  
190 untransformed *E. coli* BL21 (DE3); (2) Supernatant of transformed and IPTG-induced *E. coli*  
191 BL21 (DE3) after sonication; (3) Pelleted inclusion body and cellular debris of transformed and  
192 IPTG-induced *E. coli* BL21 (DE3) after sonication.

## 193 **rEDIII purification**

194 ZIKV rEDIII was purified using HisTrap HP histidine-tagged protein purification columns. rEDIII  
195 was mainly detected in insoluble inclusion bodies (Fig 3A, lane 2). Lane 2, 3 and 4 was loaded  
196 with eluents of washing buffers. The rEDIII was not detected these lanes (Fig 3B, lane 2, 3 and  
197 4). Lastly, purified rEDIII were successfully eluted, which was shown in a single protein band  
198 (Fig 3B, lane 5 and 6).

199

### 200 **Fig 3A. SDS-PAGE analyses of different portions of bacterial cell lysate after IPTG**

201 **induction.** (M) Protein marker; (1) The supernatant of cellular lysate after sonication and  
202 centrifugation; (2) The pelleted inclusion body and cell debris after sonication and centrifugation.

203 The distinctive protein band (indicated by black arrow) shows the expected position of ZIKV  
204 rEDIII which present in the inclusion body of the *E. coli*. **Fig 3B. The replicated samples of**

205 **lane 2 in figure 3A were directed to protein purification using Ni-charged resins.** (1) The

206 first flow-through of ZIKV rEDIII inclusion body dissolved in buffers supplemented with 8M urea;

207 (2, 3 & 4) Flow-through of washing buffers supplemented with 6 M, 4 M and 2 M of urea,

208 respectively; (5 & 6) First and second elution of ZIKV rEDIII from the Ni-charged resins using

209 elution buffers supplemented with 500 mM imidazole. ZIKV rEDIII was successfully purified with

210 the expected size of protein indicated by black arrow (14 kDa).

## 211 **LC-MS/MS**

212 The sequences of tryptic digested peptides of ZIKV rEDIII were aligned with the protein  
213 database through PEAKS DB search and showed alignment with ZIKV polyprotein  
214 (A0A0U4ETI0) starting from position 601 to 699 (Fig 4).

215

### 216 **Fig 4. Alignment of tryptic-digested peptides of recombinant ZIKV rEDIII using PEAKS**

217 **8.0.** The amino acids of subject sequence (domain III of ZIKV) are bold and highlighted in grey.

218 All query sequences are illustrated in blue.

## 219 **rEDIII protein integrity test**

220 Dot blot assay was conducted to test the integrity of purified rEDIII. Antisera derived from mock-  
221 infected and ZIKV -infected mice and were used. The results showed that antisera was able to  
222 recognise the purified rEDIII (Fig 5), which also explains the chances of administered ZIKV  
223 rEDIII being recognised by antibodies produced by recipients who were previously infected by  
224 ZIKV. On the other hand, no binding to ZIKV rEDIII was observed when the antiserum of mock-  
225 infected mice was used in the dot-blot assay.

226

### 227 **Fig 5. Dot-blot analyses of recombinant domain III of Zika virus (ZIKV) envelope protein**

228 **(rEDIII).** All 6 samples were loaded with either 1 µg of purified ZIKV rEDIII, or bacterial cell

229 lysate of post- or pre-IPTG induction. All samples were air dried prior to incubating with

230 antiserum derived from either ZIKV-infected or mock-infected mice.

## 231 Discussion

232 Flavivirus is responsible for a number of economically-important diseases in human, including  
233 dengue fever, zika fever, yellow fever, West Nile fever and Japanese encephalitis fever. The  
234 discovery and development of new vaccine candidates have been in need, and the domain III of  
235 flavivirus envelope protein (EDIII) has long been recognised as a suitable candidate due to its  
236 high antigenicity and ability to stimulate the production of antibodies by the immune system [43–  
237 45]

238

239 In this study, we employed the coding sequence of ZIKV rEDIII reported by Yang *et al.*  
240 (GenBank accession number: AMC13911.1) in their previous studies for immunogenicity  
241 assessments in mammals [35,36]. Yang *et al.* concluded that ZIKV rEDIII produced in either  
242 plants or *E. coli* had successfully induced immune response to confer sufficient protection  
243 against ZIKV infection in mice. However, being one of the most neglected diseases in tropical  
244 regions, Zika fever manifested in many individuals without medical attentions, which individuals  
245 have developed natural-active immunity against the rEDIII. In order to assess the specificity of  
246 these antisera against this ZIKV rEDIII, this study developed and obtained mice antisera  
247 containing natural-active antibodies for antibody specificity tests against the ZIKV rEDIII.

248

249 A number of concerns have been raised for marketed vaccines, including polio vaccine and  
250 measles vaccine which cause toxic shock syndrome [46–49]. Although some avoidable cases  
251 were reported to be human-caused [50], the major dengue vaccination programme in  
252 Philippines led to a theoretical elevated risk of dengue haemorrhagic fever (DHF) in  
253 seronegative vaccine recipients [51]. Although more seroepidemiological surveillance data is  
254 needed, adverse manifestations of Zika virus infection due to antibody-dependent

255 enhancement (ADE) has been reported [52,53]. These data highlighted the possibilities of rEDIII  
256 to cause ADE in its recipients.

257

258 We infected mice with active virus particles to raise antiserum against ZIKV. In another parallel  
259 experiment, the rEDIII was expressed in BL21(DE3) *E. coli*, extracted and purified. The protein  
260 identity was confirmed with LC-MS/MS and PEAKS DB search, with the native structure of the  
261 rEDIII confirmed by dot blot assays. Meanwhile, the dot blot assay also proved the hypothesis  
262 that the antibodies produced by natural active immunity in mammals are able to recognise the  
263 our ZIKV rEDIII protein.

264

265 ADE caused by administration of vaccine is not uncommon. Understanding immune responses  
266 to viral infections is crucial in deciphering the molecular mechanisms behind the enhanced  
267 illness by pre-existing antibodies found in the serum of vaccine recipients. Usually, ADE is  
268 caused by type III hypersensitivity of the immune system against the vaccine candidate. Cases  
269 of ADE after vaccine administration were reported for several vaccine candidates including  
270 inactivated and purified influenza virus [54], recombinant Hepatitis B virus [55] and Dengue virus  
271 [56,57]. Since the knowledge and understanding of ADE caused by Zika virus infection is  
272 sparse, more attentions should be placed in the development of rEDIII into ZIKV vaccine, where  
273 the protein subunit may develop ADE in the vaccine recipients. This is especially important  
274 when Dengue virus, the virus that is prevalent in causing ADE, and Zika virus are taxonomically  
275 close, with evidences showing serological cross reactivity of antibodies against both viruses in  
276 mammals [10–14].

277

278 Dejnirattisai *et al.* reported that most of the antibodies against DENV epitopes also bound to  
279 ZIKV, but unable to neutralise ZIKV and instead promoted ADE [12]. Recently, other  
280 researchers have discussed the risk-to-reward ratio of developing ZIKV vaccine, with regards to

281 current controversial data and unknown interplay between members of flavivirus [53]. These  
282 important information must be taken into considerations especially during the development of  
283 any virus vaccine.

284

285 Several improvements can be made to enhance the bioavailability and effect of ZIKV vaccine  
286 using rEDIII as the vaccine candidate. This can be done through the optimisation of adjuvant,  
287 which has been thoroughly reviewed by Hogenesch *et al.* in 2018 [58]. HogenEsch *et al.*  
288 described the pharmacokinetics of aluminium-based adjuvants, characteristics of antigens, and  
289 formulations of vaccines with aluminium adjuvants. On the other hand, in light with its potential  
290 wide global distributions of ZIKV vaccine across different continents, the thermodynamic stability  
291 of ZIKV rEDIII can also be improved by molecular structural modifications or optimisation of  
292 subcellular protein expression [59].

293

294 In conclusion, although rEDIII can be the ideal protein candidate in the development of ZIKV  
295 vaccine, our results, in conjunction with several previous studies, call for a greater attention on  
296 the mechanisms of ADE in vaccine recipients. Our findings are also useful for ZIKV rEDIII  
297 applications in the field of virus diagnostics, vaccine developments and viral disease therapies.

## 298 **Acknowledgements**

299 Authors acknowledge the continuous support given by the Virus–Host Interaction Research  
300 Group (Jeffrey Cheah School of Medicine and Health Sciences, Monash University Malaysia),  
301 Biopharmaceutical Research Unit (Faculty of Pharmacy, SEGi University), and Research and  
302 Innovation Management Centre (RIMC, SEGi University).



## 303 **References**

- 304 1. Vorou R. Zika virus, vectors, reservoirs, amplifying hosts, and their potential to spread  
305 worldwide: what we know and what we should investigate urgently. *Int J Infect Dis.*  
306 2016;48: 85–90.
- 307 2. Tham H-W, Balasubramaniam V, Ooi MK, Chew M-F. Viral Determinants and Vector  
308 Competence of Zika Virus Transmission. *Front Microbiol.* 2018;9.  
309 doi:10.3389/fmicb.2018.01040
- 310 3. Wikan N, Smith DR. Zika virus: history of a newly emerging arbovirus. *Lancet Infect Dis.*  
311 2016;16: e119–e126.
- 312 4. Lanciotti RS, Kosoy OL, Laven JJ, Velez JO, Lambert AJ, Johnson AJ, et al. Genetic and  
313 serologic properties of Zika virus associated with an epidemic, Yap State, Micronesia,  
314 2007. *Emerg Infect Dis.* 2008;14: 1232–1239.
- 315 5. Duffy MR, Chen T-H, Thane Hancock W, Powers AM, Kool JL, Lanciotti RS, et al. Zika  
316 Virus Outbreak on Yap Island, Federated States of Micronesia. *N Engl J Med.* 2009;360:  
317 2536–2543.
- 318 6. Hussain A, Ali F, Latiwesh OB, Hussain S. A Comprehensive Review of the Manifestations  
319 and Pathogenesis of Zika Virus in Neonates and Adults. *Cureus.* 2018;10: e3290.
- 320 7. Haddow AD, Schuh AJ, Yasuda CY, Kasper MR, Heang V, Huy R, et al. Genetic  
321 characterization of Zika virus strains: geographic expansion of the Asian lineage. *PLoS*  
322 *Negl Trop Dis.* 2012;6: e1477.
- 323 8. Theel ES, Hata DJ. Diagnostic Testing for Zika Virus: a Postoutbreak Update. *J Clin*

- 324 Microbiol. 2018;56. doi:10.1128/JCM.01972-17
- 325 9. Barrett ADT. Current status of Zika vaccine development: Zika vaccines advance into  
326 clinical evaluation. NPJ Vaccines. 2018;3: 24.
- 327 10. Watanabe S, Tan NWW, Chan KWK, Vasudevan SG. Dengue Virus and Zika Virus  
328 Serological Cross-reactivity and Their Impact on Pathogenesis in Mice. J Infect Dis.  
329 2019;219: 223–233.
- 330 11. Zimmerman MG, Quicke KM, O’Neal JT, Arora N, Machiah D, Priyamvada L, et al. Cross-  
331 Reactive Dengue Virus Antibodies Augment Zika Virus Infection of Human Placental  
332 Macrophages. Cell Host Microbe. 2018;24: 731–742.e6.
- 333 12. Dejnirattisai W, Supasa P, Wongwiwat W, Rouvinski A, Barba-Spaeth G, Duangchinda T,  
334 et al. Dengue virus sero-cross-reactivity drives antibody-dependent enhancement of  
335 infection with zika virus. Nat Immunol. 2016;17: 1102–1108.
- 336 13. Stettler K, Beltramello M, Espinosa DA, Graham V, Cassotta A, Bianchi S, et al. Specificity,  
337 cross-reactivity, and function of antibodies elicited by Zika virus infection. Science.  
338 2016;353: 823–826.
- 339 14. George J, Valiant WG, Mattapallil MJ, Walker M, Huang Y-JS, Vanlandingham DL, et al.  
340 Prior Exposure to Zika Virus Significantly Enhances Peak Dengue-2 Viremia in Rhesus  
341 Macaques. Sci Rep. 2017;7: 10498.
- 342 15. Yan G, Pang L, Cook AR, Ho HJ, Win MS, Khoo AL, et al. Distinguishing Zika and Dengue  
343 Viruses through Simple Clinical Assessment, Singapore. Emerg Infect Dis. 2018;24: 1565–  
344 1568.
- 345 16. Alshammari SA, Alamri YS, Rabhan FS, Alabdullah AA, Alsanie NA, Almarshad FA, et al.

- 346 Overview of dengue and Zika virus similarity, what can we learn from the Saudi experience  
347 with dengue fever? *Int J Health Sci* . 2018;12: 77–82.
- 348 17. Uncini A, Shahrizaila N, Kuwabara S. Zika virus infection and Guillain-Barré syndrome: a  
349 review focused on clinical and electrophysiological subtypes. *J Neurol Neurosurg*  
350 *Psychiatry*. 2017;88: 266–271.
- 351 18. Barbi L, Coelho AVC, de Alencar LCA, Crovella S. Prevalence of Guillain-Barré syndrome  
352 among Zika virus infected cases: a systematic review and meta-analysis [Internet]. *The*  
353 *Brazilian Journal of Infectious Diseases*. 2018. pp. 137–141. doi:10.1016/j.bjid.2018.02.005
- 354 19. Hills SL, Fischer M, Petersen LR. Epidemiology of Zika Virus Infection [Internet]. *The*  
355 *Journal of Infectious Diseases*. 2017. pp. S868–S874. doi:10.1093/infdis/jix434
- 356 20. Bogoch II, Brady OJ, Kraemer MUG, German M, Creatore MI, Kulkarni MA, et al.  
357 Anticipating the international spread of Zika virus from Brazil. *Lancet*. 2016;387: 335–336.
- 358 21. Craig AT, Butler MT, Pastore R, Paterson BJ, Durrheim DN. Acute flaccid paralysis  
359 incidence and Zika virus surveillance, Pacific Islands. *Bull World Health Organ*. 2017;95:  
360 69–75.
- 361 22. Gulland A. First case of Zika virus spread through sexual contact is detected in UK. *BMJ*.  
362 2016;355: i6500.
- 363 23. Zammarchi L, Tappe D, Fortuna C, Remoli M, Günther S, Venturi G, et al. Zika virus  
364 infection in a traveller returning to Europe from Brazil, March 2015. *Eurosurveillance*.  
365 2015;20: 21153.
- 366 24. O’Dowd A. UK records four cases of Zika virus in past six weeks. *BMJ*. 2016;352: i875.
- 367 25. Taira M, Ogawa T, Nishijima H, Yamamoto K, Hotta C, Akita M, et al. The First Case of

- 368 Zika Virus Isolated from a Japanese Patient Who Returned to Japan from Fiji in 2016. *Jpn J*  
369 *Infect Dis.* 2017;70: 586–589.
- 370 26. Gourinat A-C, O'Connor O, Calvez E, Goarant C, Dupont-Rouzeyrol M. Detection of Zika  
371 Virus in Urine. *Emerg Infect Dis.* 2015;21: 84–86.
- 372 27. Lamb LE, Bartolone SN, Tree MO, Conway MJ, Rossignol J, Smith CP, et al. Rapid  
373 Detection of Zika Virus in Urine Samples and Infected Mosquitos by Reverse Transcription-  
374 Loop-Mediated Isothermal Amplification. *Sci Rep.* 2018;8: 3803.
- 375 28. Musso D, Roche C, Nhan T-X, Robin E, Teissier A, Cao-Lormeau V-M. Detection of Zika  
376 virus in saliva. *J Clin Virol.* 2015;68: 53–55.
- 377 29. Shukla S, Hong S-Y, Chung SH, Kim M. Rapid Detection Strategies for the Global Threat of  
378 Zika Virus: Current State, New Hypotheses, and Limitations. *Front Microbiol.* 2016;7: 1685.
- 379 30. Safronetz D, Sloan A, Stein DR, Mendoza E, Barairo N, Ranadheera C, et al. Evaluation of  
380 5 Commercially Available Zika Virus Immunoassays. *Emerg Infect Dis.* 2017;23: 1577–  
381 1580.
- 382 31. Pawley D, Dikici E, Deo S, Daunert S. Current methods of Zika virus detection and  
383 limitations [Internet]. 2018. Available:  
384 [https://www.clinlabint.com/fileadmin/user\\_upload/1.\\_CLI\\_FebMarch\\_2018\\_FINAL.pdf](https://www.clinlabint.com/fileadmin/user_upload/1._CLI_FebMarch_2018_FINAL.pdf)
- 385 32. Sreaton G, Mongkolsapaya J, Yacoub S, Roberts C. New insights into the  
386 immunopathology and control of dengue virus infection. *Nat Rev Immunol.* 2015;15: 745–  
387 759.
- 388 33. Shanmugam RK, Ramasamy V, Shukla R, Arora U, Swaminathan S, Khanna N. Pichia  
389 pastoris-expressed Zika virus envelope domain III on a virus-like particle platform: design,

- 390 production and immunological evaluation. *Pathog Dis.* 2019;77. doi:10.1093/femspd/ftz026
- 391 34. Liang H, Yang R, Liu Z, Li M, Liu H, Jin X. Recombinant Zika virus envelope protein elicited  
392 protective immunity against Zika virus in immunocompetent mice. *PLoS One.* 2018;13:  
393 e0194860.
- 394 35. Yang, Dent M, Lai H, Sun H, Chen Q. Immunization of Zika virus envelope protein domain  
395 III induces specific and neutralizing immune responses against Zika virus. *Vaccine.*  
396 2017;35: 4287–4294.
- 397 36. Yang M, Lai H, Sun H, Chen Q. Virus-like particles that display Zika virus envelope protein  
398 domain III induce potent neutralizing immune responses in mice. *Sci Rep. Nature*  
399 *Publishing Group;* 2017;7: 7679.
- 400 37. Yang M, Sun H, Lai H, Hurtado J, Chen Q. Plant-produced Zika virus envelope protein  
401 elicits neutralizing immune responses that correlate with protective immunity against Zika  
402 virus in mice. *Plant Biotechnol J.* 2018;16: 572–580.
- 403 38. Premkumar L, Collins M, Graham S, Liou G-JA, Lopez CA, Jadi R, et al. Development of  
404 Envelope Protein Antigens To Serologically Differentiate Zika Virus Infection from Dengue  
405 Virus Infection. *J Clin Microbiol.* 2018;56. doi:10.1128/JCM.01504-17
- 406 39. Sylvia EA, Easter MK, Magdline SHS. Overexpression of recombinant domain III envelope  
407 protein of Zika virus. *Malays J Microbiol.* 2018;14: 325–328.
- 408 40. Laemmli UK. Cleavage of structural proteins during the assembly of the head of  
409 bacteriophage T4. *Nature.* 1970;227: 680–685.
- 410 41. Towbin H, Staehelin T, Gordon J. Electrophoretic transfer of proteins from polyacrylamide  
411 gels to nitrocellulose sheets: procedure and some applications. 1979. *Biotechnology.*

- 412 1992;24: 145–149.
- 413 42. Ma B, Zhang K, Hendrie C, Liang C, Li M, Doherty-Kirby A, et al. PEAKS: powerful software  
414 for peptide de novo sequencing by tandem mass spectrometry. *Rapid Commun Mass*  
415 *Spectrom.* 2003;17: 2337–2342.
- 416 43. Chávez JH E al. Domain III peptides from flavivirus envelope protein are useful antigens for  
417 serologic diagnosis and targets for immunization. - PubMed - NCBI [Internet]. [cited 16 Jan  
418 2019]. Available: <https://www.ncbi.nlm.nih.gov/pubmed/20817489>
- 419 44. Watterson D E al. Residues in domain III of the dengue virus envelope glycoprotein  
420 involved in cell-surface glycosaminoglycan binding. - PubMed - NCBI [Internet]. [cited 16  
421 Jan 2019]. Available: <https://www.ncbi.nlm.nih.gov/pubmed/21957126>
- 422 45. Chu J-HJ, Chiang C-CS, Ng M-L. Immunization of Flavivirus West Nile Recombinant  
423 Envelope Domain III Protein Induced Specific Immune Response and Protection against  
424 West Nile Virus Infection. *The Journal of Immunology.* American Association of  
425 Immunologists; 2007;178: 2699–2705.
- 426 46. Fisher SG, Weber L, Carbone M. Cancer risk associated with simian virus 40 contaminated  
427 polio vaccine. *Anticancer Res.* 1999;19: 2173–2180.
- 428 47. Institute of Medicine (US) Immunization Safety Review Committee. Immunization Safety  
429 Review: SV40 Contamination of Polio Vaccine and Cancer. Stratton K, Almario DA,  
430 McCormick MC, editors. Washington (DC): National Academies Press (US); 2014.
- 431 48. Aylward B, Tangermann R. The global polio eradication initiative: lessons learned and  
432 prospects for success. *Vaccine.* 2011;29 Suppl 4: D80–5.
- 433 49. Parthasarathy A. Contamination of reconstituted multidose measles vaccine vial and toxic

- 434 shock syndrome in Tamilnadu. *Indian Pediatr.* 2008;45: 606.
- 435 50. Cousins S. Contaminated vaccine deaths a serious setback for Syria. *Lancet.* 2014;384:  
436 1172.
- 437 51. Halstead SB. Safety issues from a Phase 3 clinical trial of a live-attenuated chimeric yellow  
438 fever tetravalent dengue vaccine. *Hum Vaccin Immunother.* 2018;14: 2158–2162.
- 439 52. Mahalingam S, Teixeira MM, Halstead SB. Zika enhancement: a reality check. *Lancet*  
440 *Infect Dis.* 2017;17: 686–688.
- 441 53. Martín-Acebes MA, Saiz J-C, Jiménez de Oya N. Antibody-Dependent Enhancement and  
442 Zika: Real Threat or Phantom Menace? *Front Cell Infect Microbiol.* 2018;8: 44.
- 443 54. Chiong FJK, Loewenthal M, Boyle M, Attia J. Serum sickness-like reaction after influenza  
444 vaccination. *BMJ Case Rep.* 2015;2015. doi:10.1136/bcr-2015-211917
- 445 55. Froehlich H, Verma R. Arthus reaction to recombinant hepatitis B virus vaccine. *Clin Infect*  
446 *Dis.* 2001;33: 906–908.
- 447 56. de Alwis R, Williams KL, Schmid MA, Lai C-Y, Patel B, Smith SA, et al. Dengue viruses are  
448 enhanced by distinct populations of serotype cross-reactive antibodies in human immune  
449 sera. *PLoS Pathog.* 2014;10: e1004386.
- 450 57. Dejnirattisai W, Jumnainsong A, Onsirisakul N, Fitton P, Vasanawathana S, Limpitikul W, et  
451 al. Cross-reacting antibodies enhance dengue virus infection in humans. *Science.*  
452 2010;328: 745–748.
- 453 58. HogenEsch H, O’Hagan DT, Fox CB. Optimizing the utilization of aluminum adjuvants in  
454 vaccines: you might just get what you want. *NPJ Vaccines.* 2018;3: 51.

- 455 59. Zidane N, Dussart P, Bremand L, Villani ME, Bedouelle H. Thermodynamic stability of  
456 domain III from the envelope protein of flaviviruses and its improvement by molecular  
457 design. *Protein Eng Des Sel.* 2013;26: 389–399.



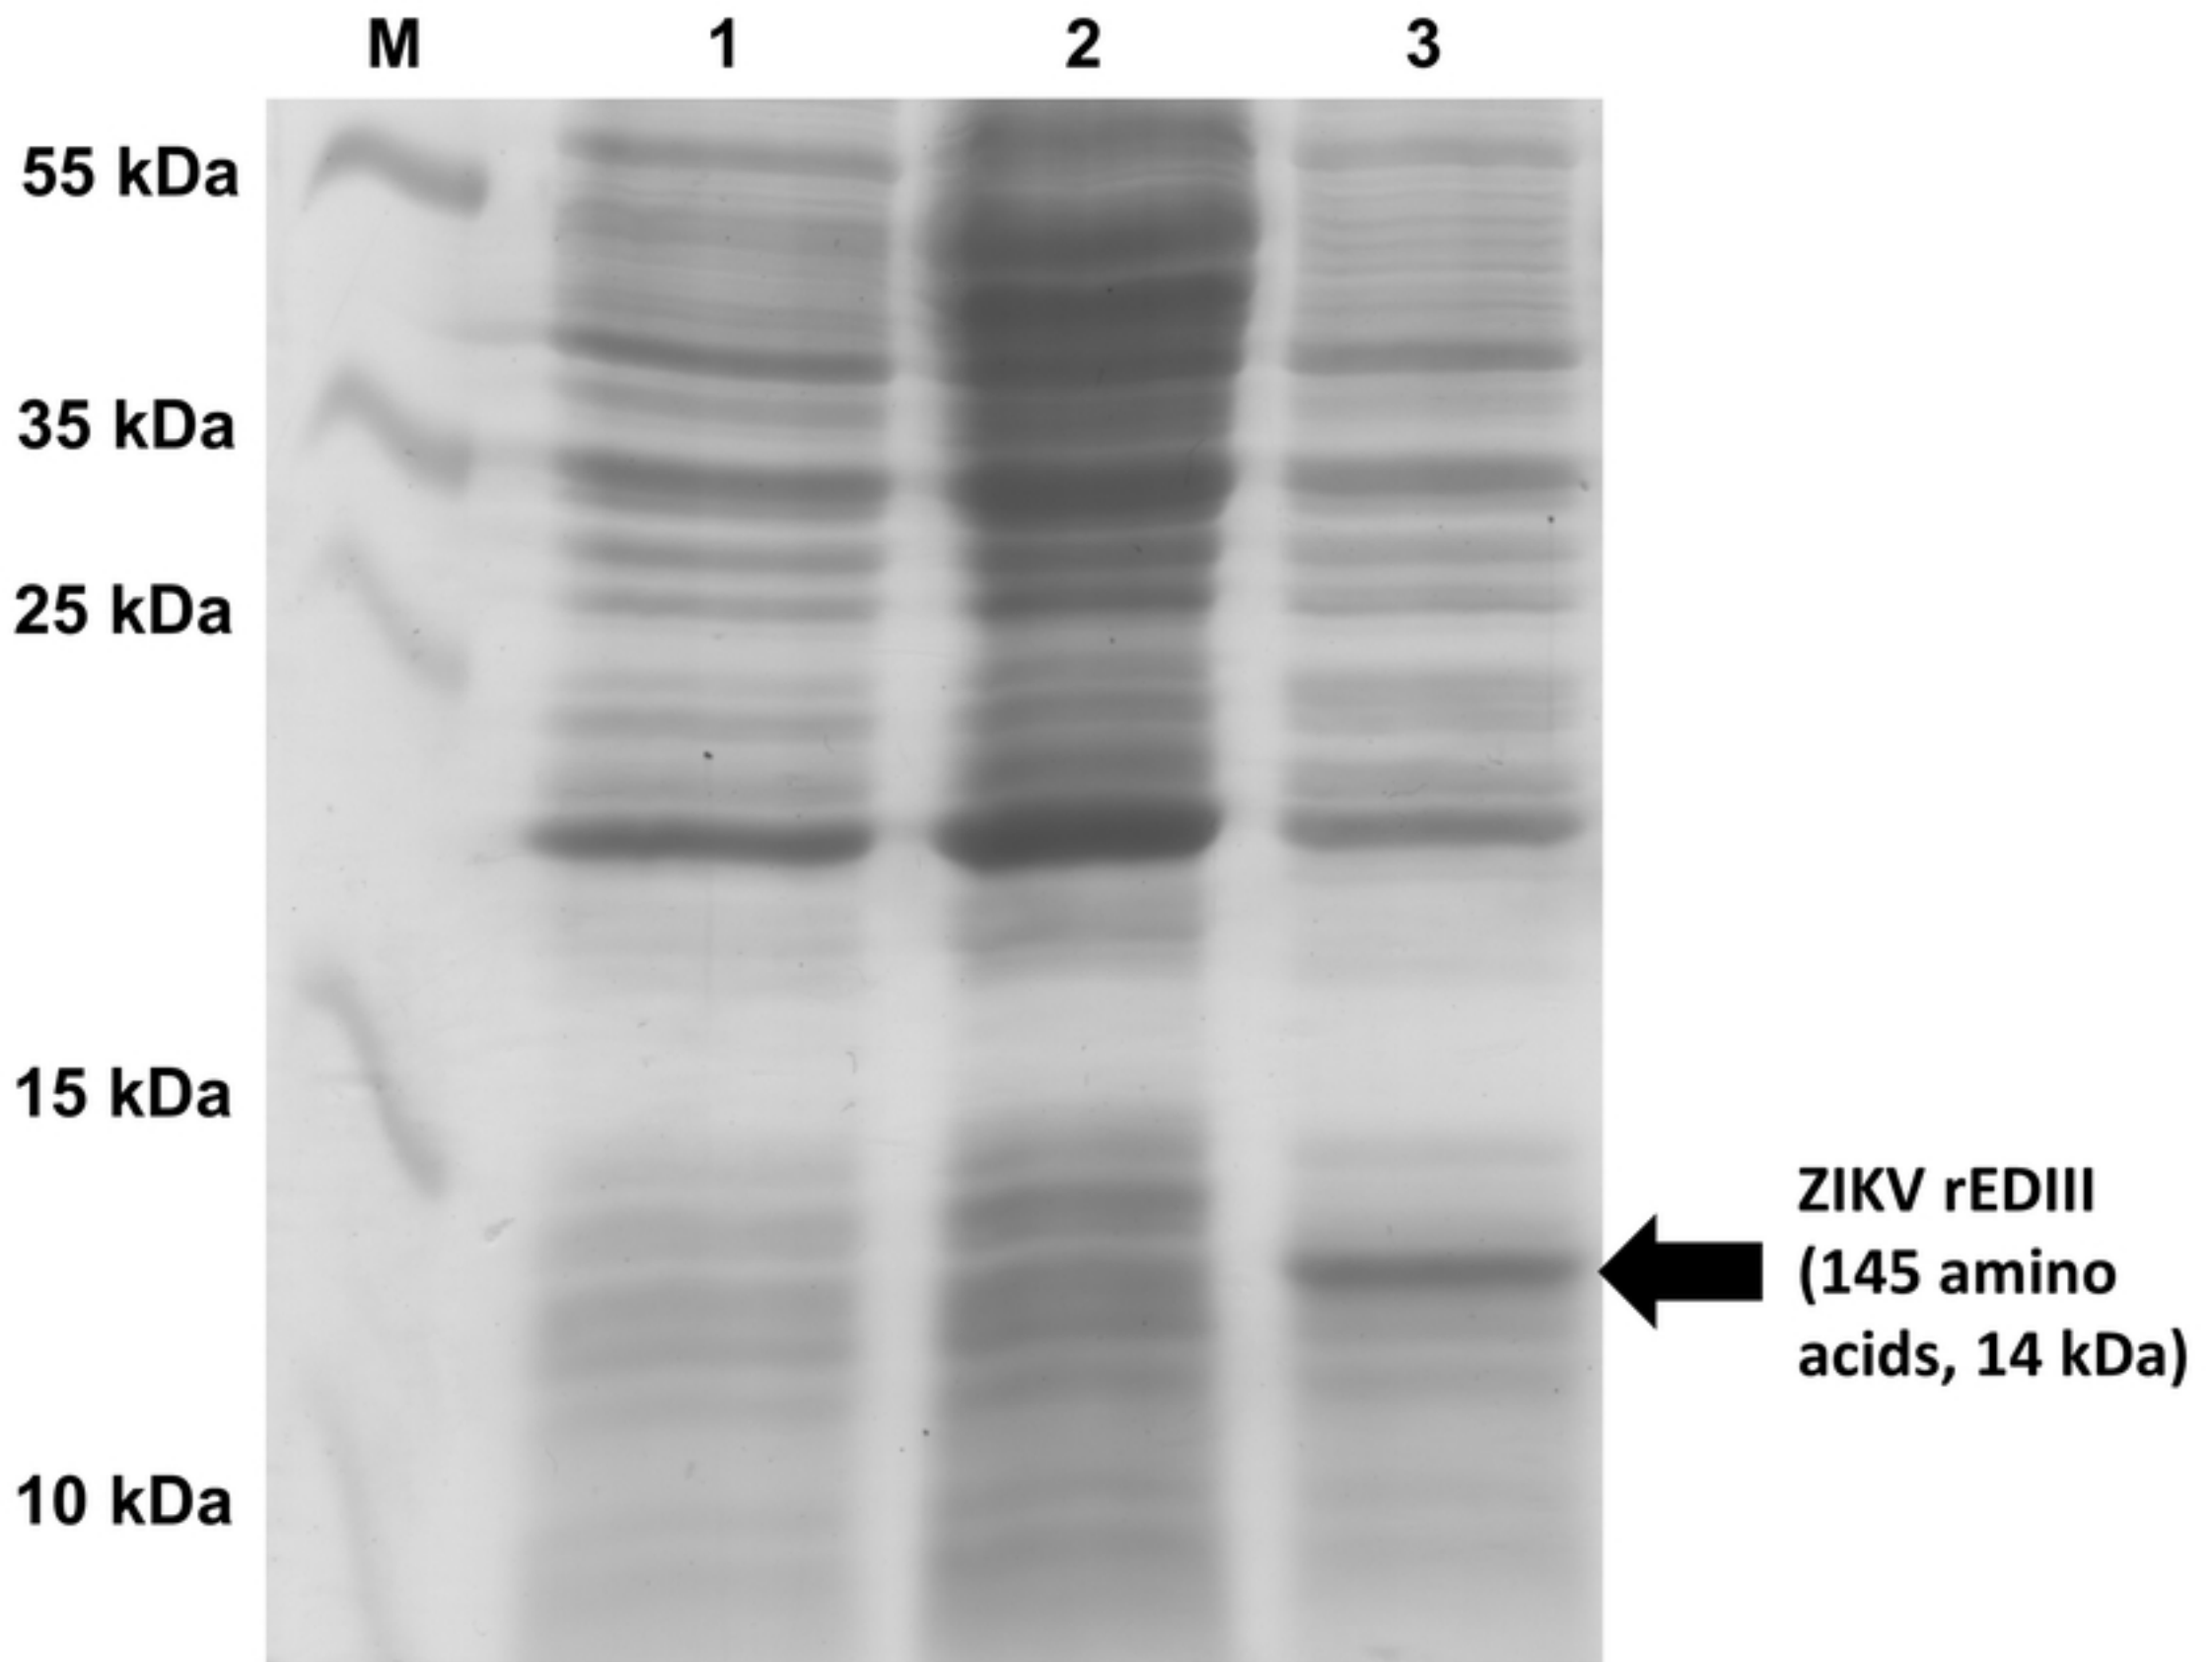

Fig1

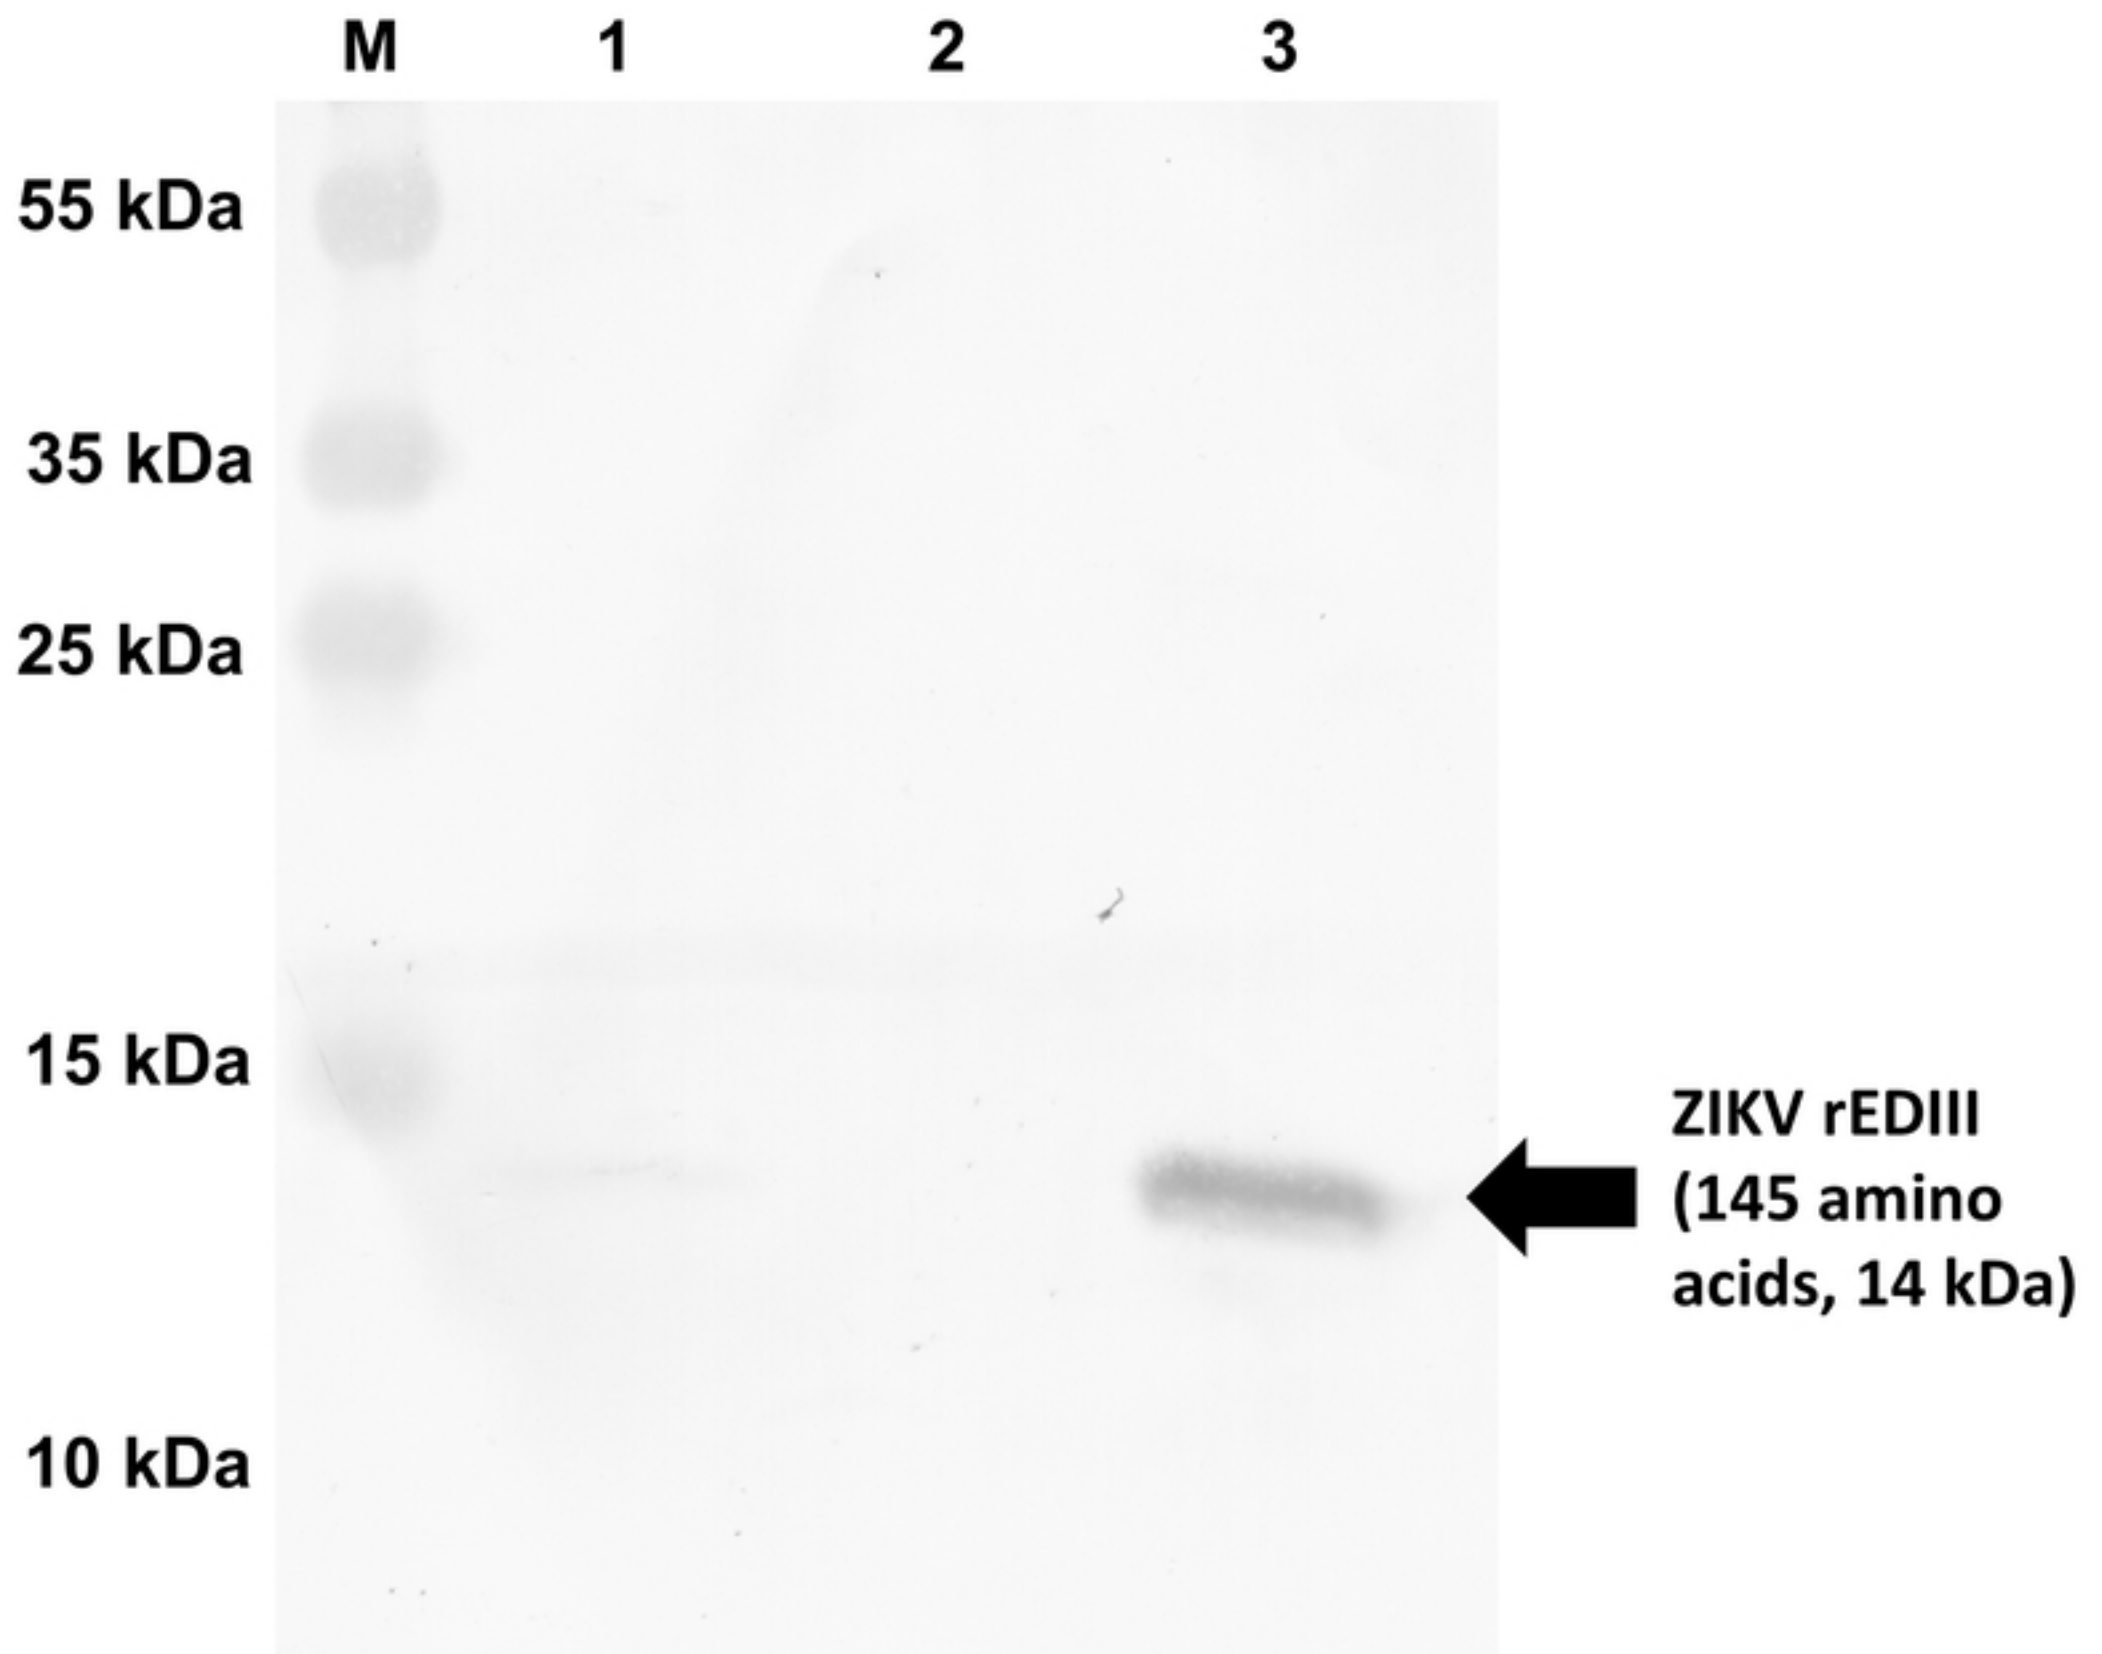

Fig2

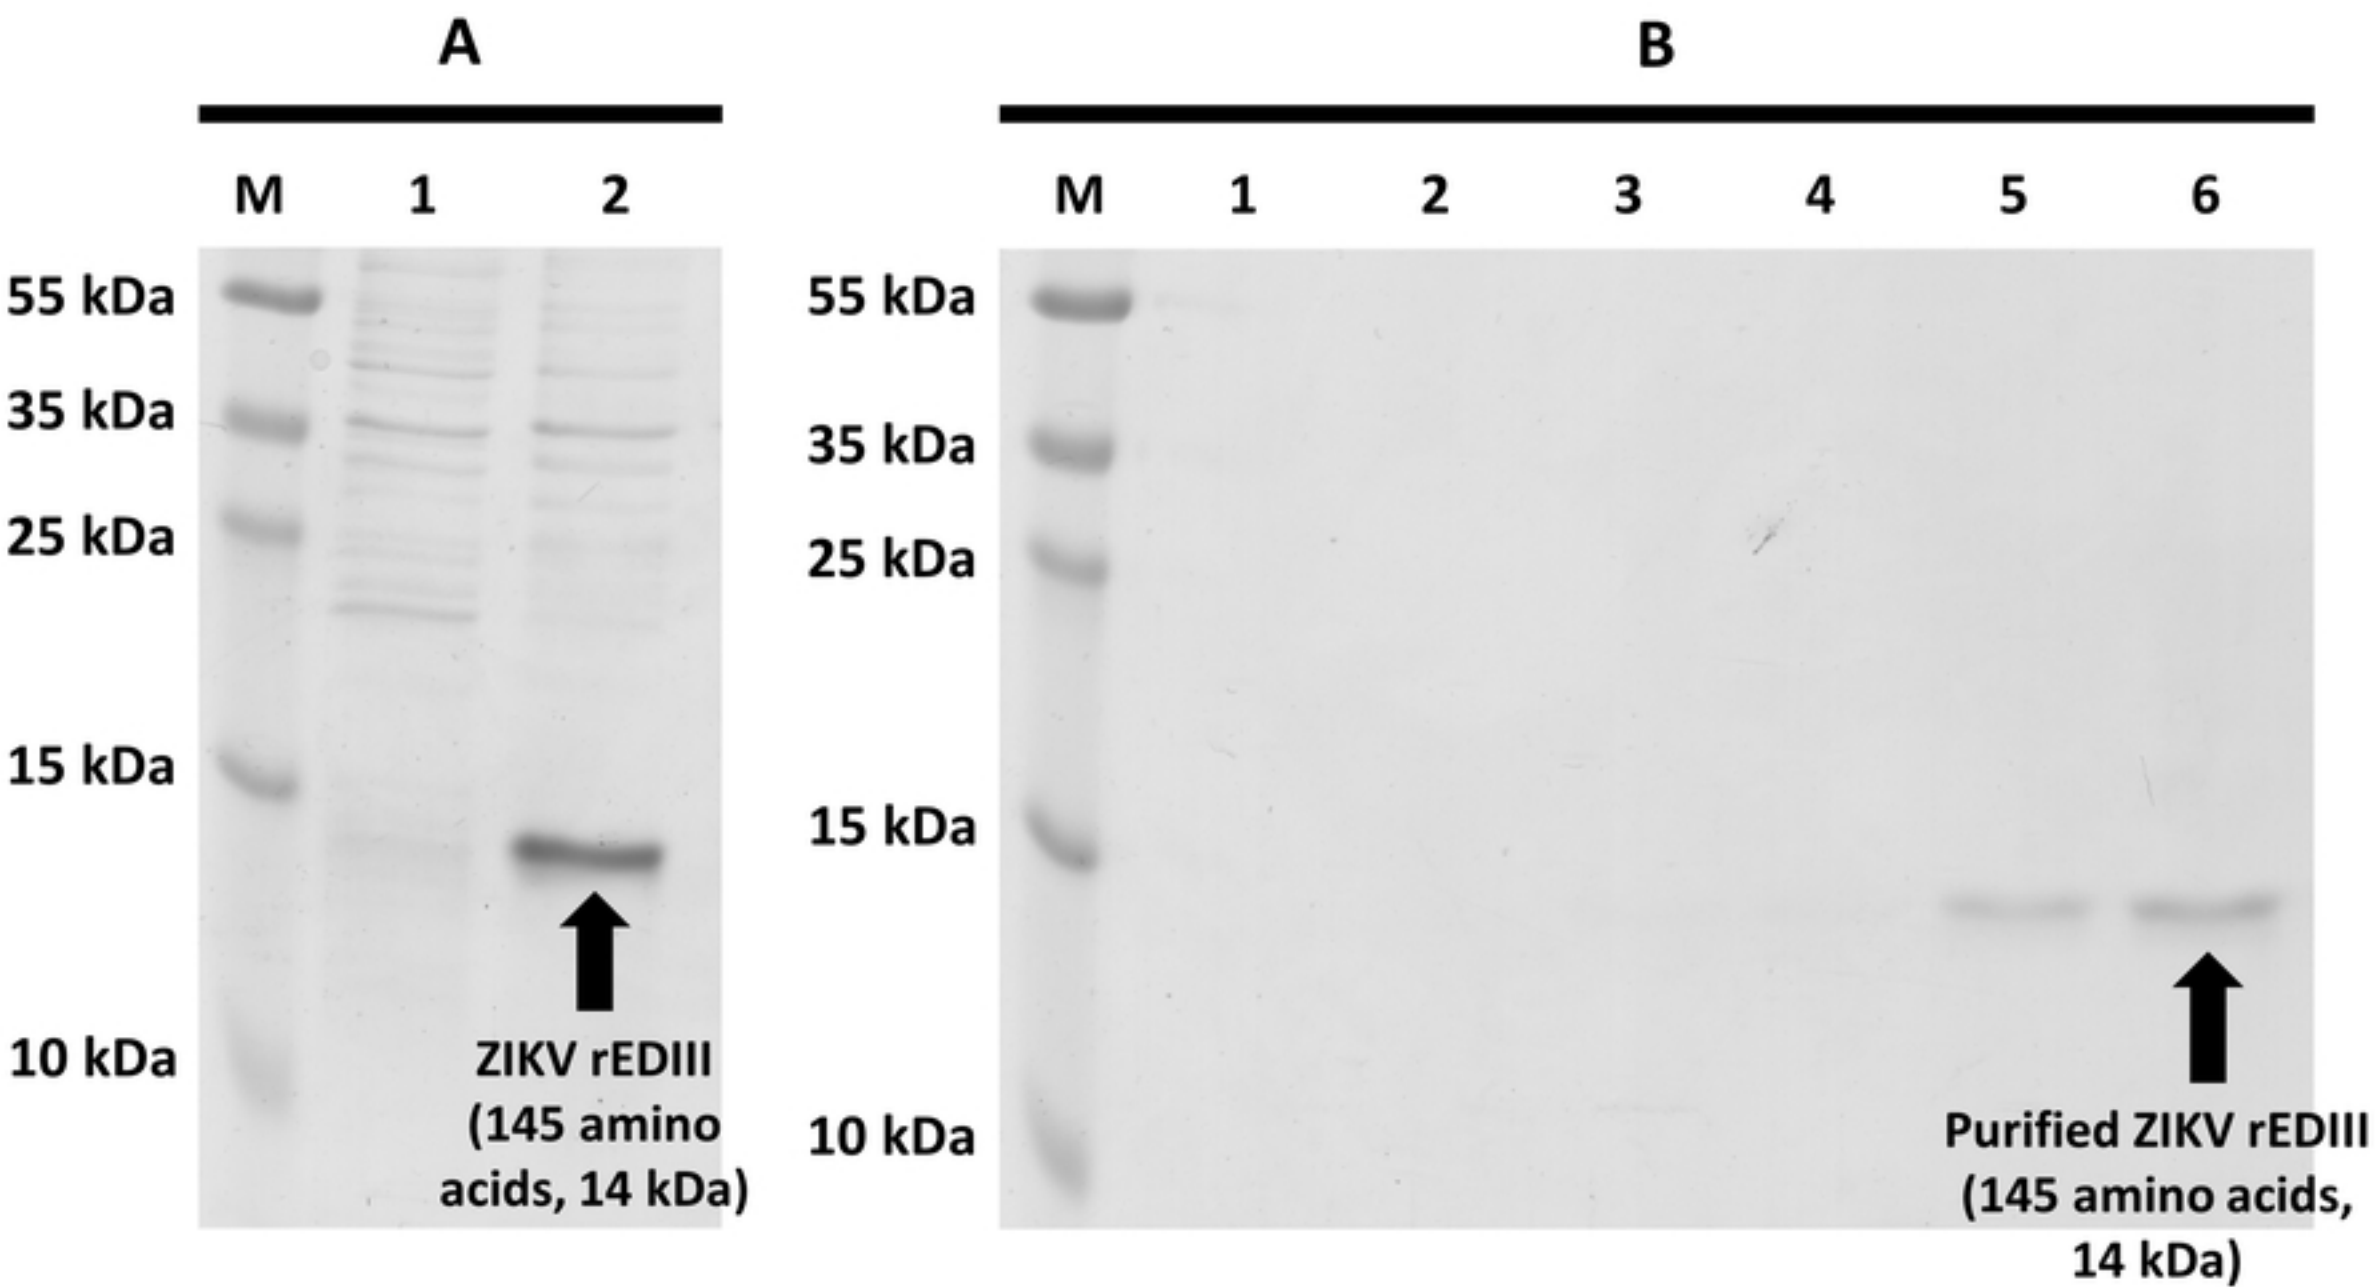

Fig3

| Accession              | -10lgP | Coverage                                                                              | Coverage P1 | #Peptides | #Unique | PTM                                                                                 | Avg. Mass | Description                                  |
|------------------------|--------|---------------------------------------------------------------------------------------|-------------|-----------|---------|-------------------------------------------------------------------------------------|-----------|----------------------------------------------|
| Proteins               |        |                                                                                       |             |           |         |                                                                                     |           |                                              |
| tr A0A0U4ETI0 A0A0U... | 199.54 | 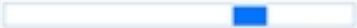 10% | 10%         | 16        | 2       |  | 101642    | Polyprotein (Fragment) OS=Zika virus (str... |

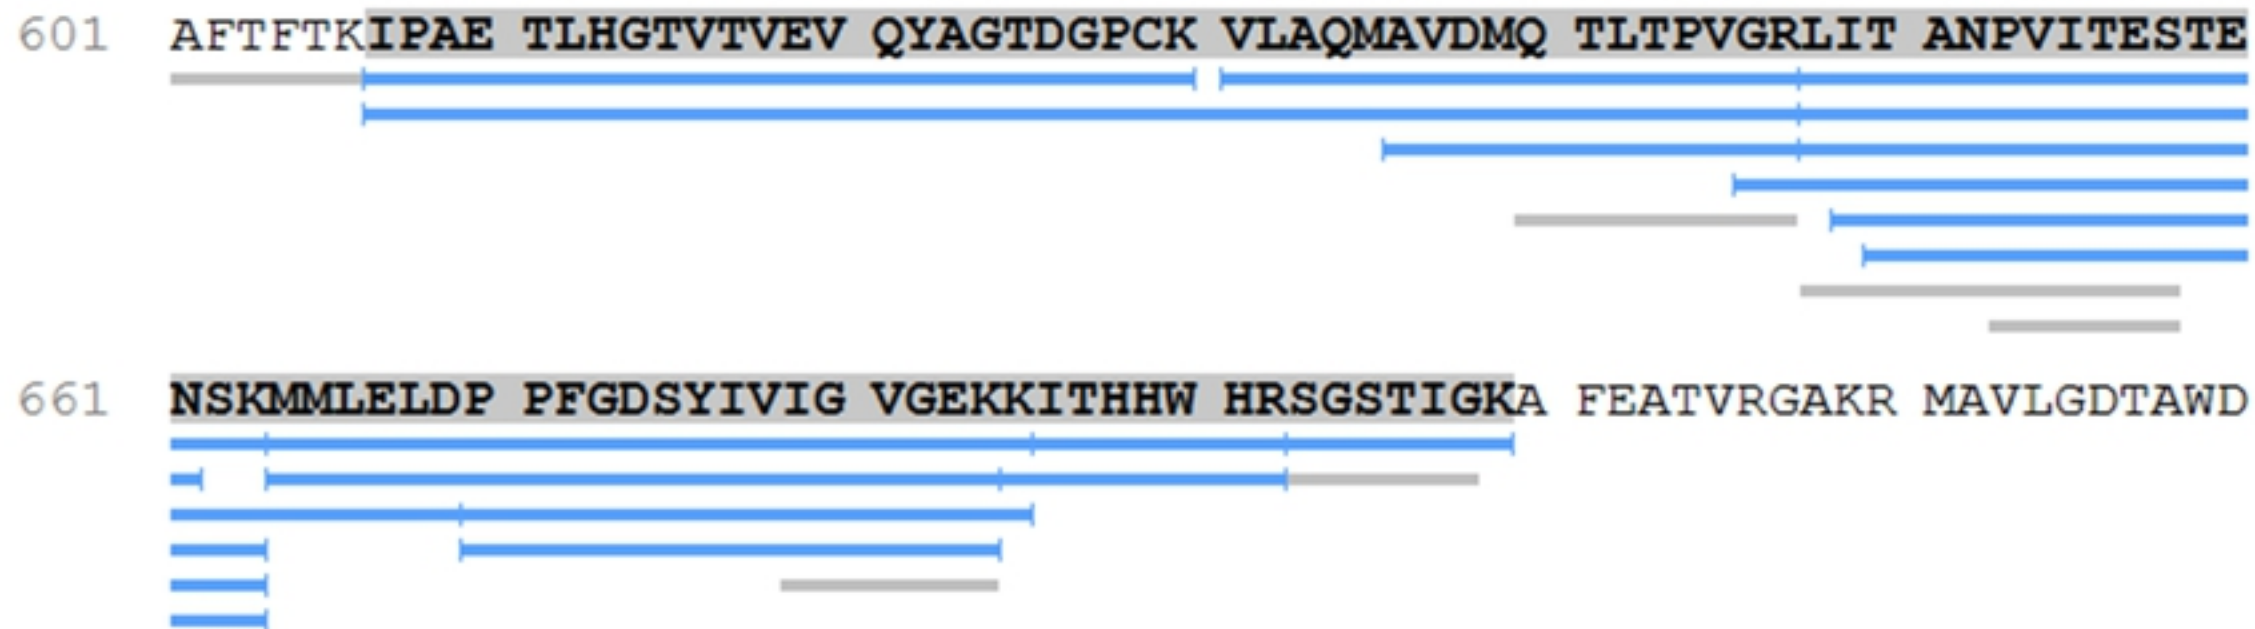

Fig4

**Purified  
ZIKV rEDIII**

**Post-IPTG  
induction**

**Pre-IPTG  
induction**

**Antiserum of  
ZIKV-infected mice**

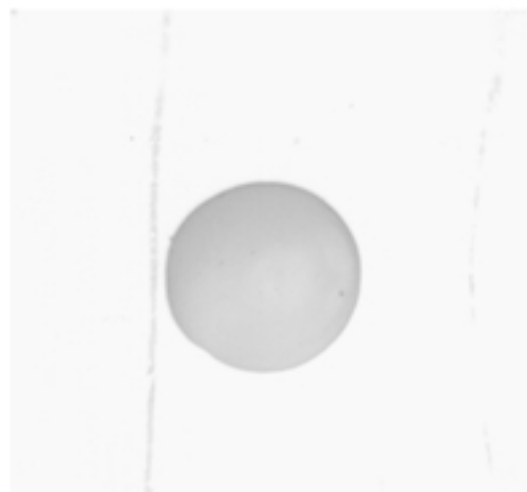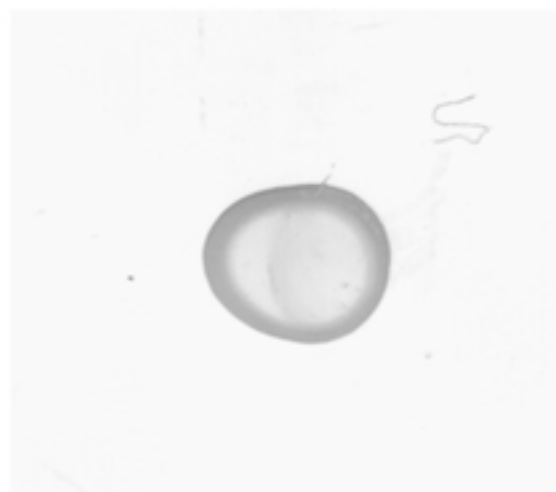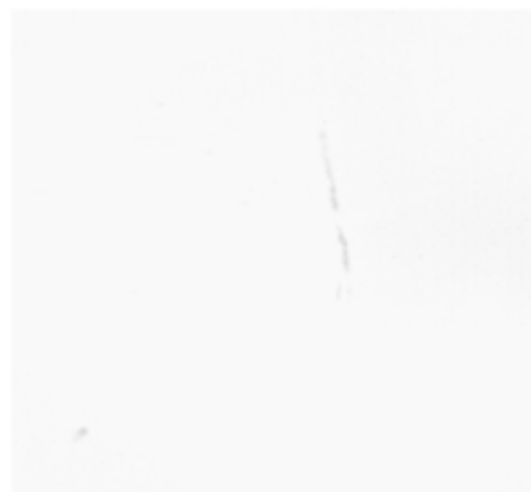

**Antiserum of  
mock-infected mice**

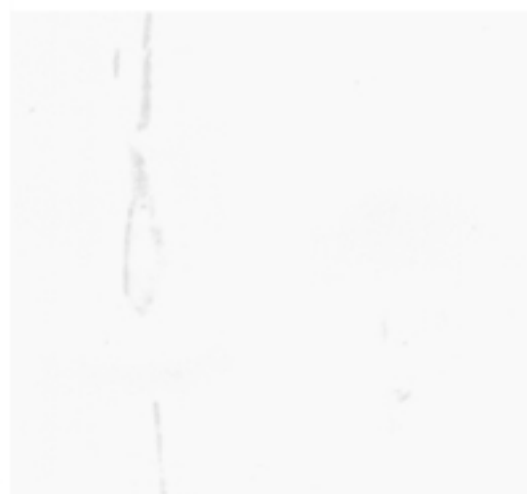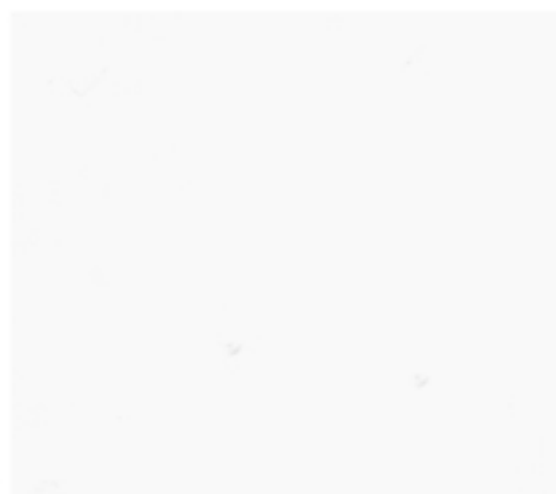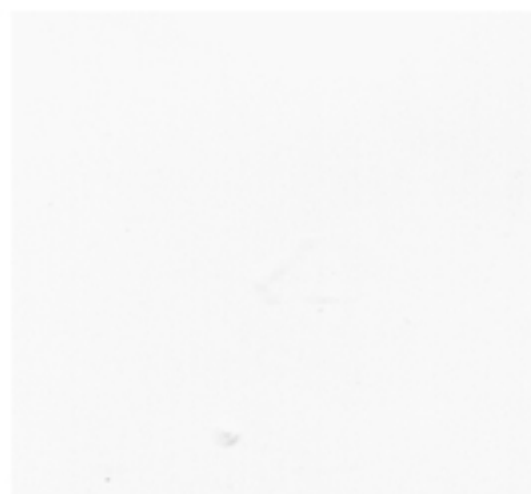

Fig5
